# Supplementary material for: Conservative management versus invasive management of significant traumatic pneumothoraces in the emergency department (the CoMiTED trial): a study protocol for a randomised non-inferiority trial
Source: PubMed Central journal article supplement (PMC11191772; doi:10.1136/bmjopen-2024-087464), 2024-06-17
Supplement: bmjopen-2024-087464.reviewer_comments.pdf [file bmjopen-2024-087464.reviewer_comments.pdf]

## PEER REVIEW HISTORY

BMJ Open publishes all reviews undertaken for accepted manuscripts. Reviewers are asked to complete a checklist review form (<http://bmjopen.bmj.com/site/about/resources/checklist.pdf>) and are provided with free text boxes to elaborate on their assessment. These free text comments are reproduced below.

## ARTICLE DETAILS

|                            |                                                                                                                                                                                                                                                                                                                                                      |
|----------------------------|------------------------------------------------------------------------------------------------------------------------------------------------------------------------------------------------------------------------------------------------------------------------------------------------------------------------------------------------------|
| <b>TITLE (PROVISIONAL)</b> | Conservative management versus invasive management of significant traumatic pneumothoraces in the Emergency Department (The CoMiTED Trial): a study protocol for a randomised non-inferiority trial                                                                                                                                                  |
| <b>AUTHORS</b>             | Blythe, Nicola; Coates, Katherine; Bengler, Jonathan; Annaw, Ammar; Banks, Jonathan; Clement, Clare; Clout, Madeleine; Edwards, Antoinette; Gaunt, Daisy; Kandiyali, Rebecca; Lane, Athene; Lecky, Fiona; Maskell, Nick; Metcalfe, Chris; Platt, Marie; Rees, Sophie; Taylor, Jodi; Thompson, Julian; Walker, Steven; West, Douglas; Carlton, Edward |

This article was not externally reviewed at BMJ Open. Protocols that have been independently assessed prior to submission to BMJ Open are usually fast-tracked to publication on the grounds that further substantial changes will not be possible. This independent assessment will usually be external, independent review for both a substantial grant award from a non-commercial or government funder and ethics approval.
